# Supplementary material for: Fe3O4 nanoclusters highly dispersed on a porous graphene support as an additive for improving the hydrogen storage properties of LiBH4
Source: Royal Society of Chemistry journal article supplement (doi:10.1039/c8ra02762e), 2018-01-01
Supplement: c8ra02762e1.pdf [file c8ra02762e1.pdf]

## Supporting Information

### **Fe<sub>3</sub>O<sub>4</sub> nanoclusters highly dispersed on porous graphene support as an additive for improving the hydrogen storage properties of LiBH<sub>4</sub>**

Guang Xu<sup>a,1</sup>, Wei Zhang<sup>b,1</sup>, Ying Zhang<sup>a,\*</sup>, Xiaoxia Zhao<sup>a</sup>, Ping Wen<sup>a</sup> and Di Ma<sup>a</sup>

<sup>a</sup> Department of Materials Science and Engineering, College of science, China University of Petroleum (Beijing), Changping District, Beijing 102249, PR China

<sup>b</sup> Hebei Key Laboratory of Applied Chemistry, School of Environmental and Chemical Engineering, Yanshan University, Qinhuangdao 066004, PR China

---

<sup>1</sup> These authors contributed equally to this work.

\* Corresponding author: Tel.: +86-010-89732273, Fax: +86-010-89732273.

E-mail address: Y.Zhang@cup.edu.cn

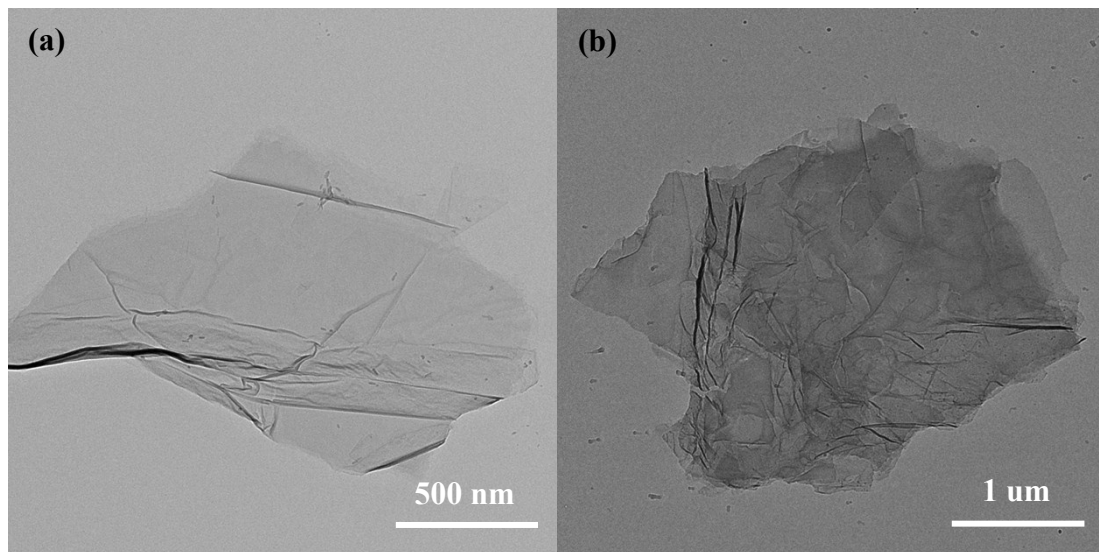

**Figure S1.** TEM images of the (a) GO and (b) rGO.

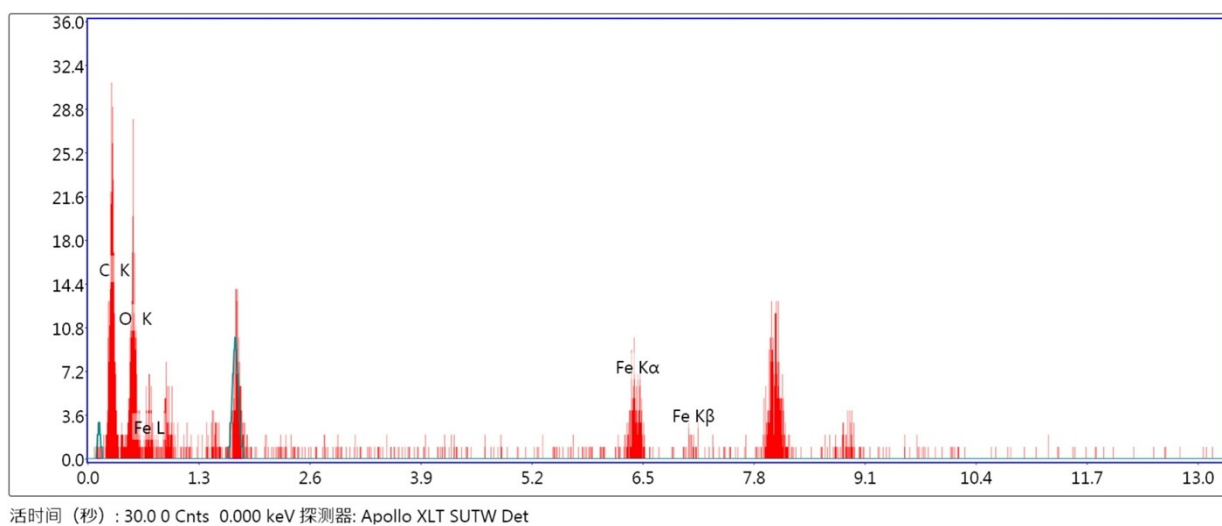

| 元素   | 重量%   | 原子%   | 净强度  | Error % |
|------|-------|-------|------|---------|
| C K  | 54.14 | 69.56 | 11.8 | 5.95    |
| O K  | 25.82 | 24.9  | 8.39 | 8.04    |
| Fe K | 20.04 | 5.54  | 5.56 | 7.02    |

**Figure S2.** EDS image of the as-prepared  $\text{Fe}_3\text{O}_4$ @rGO nanohybrid.

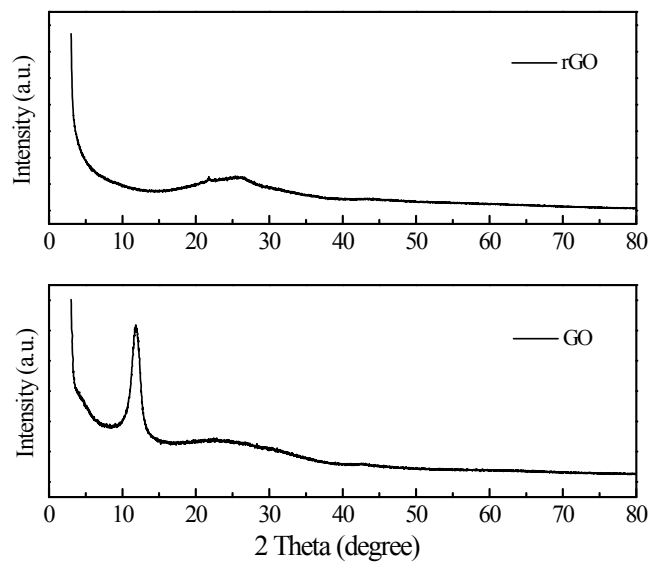

**Figure S3.** XRD patterns of the GO and rGO.

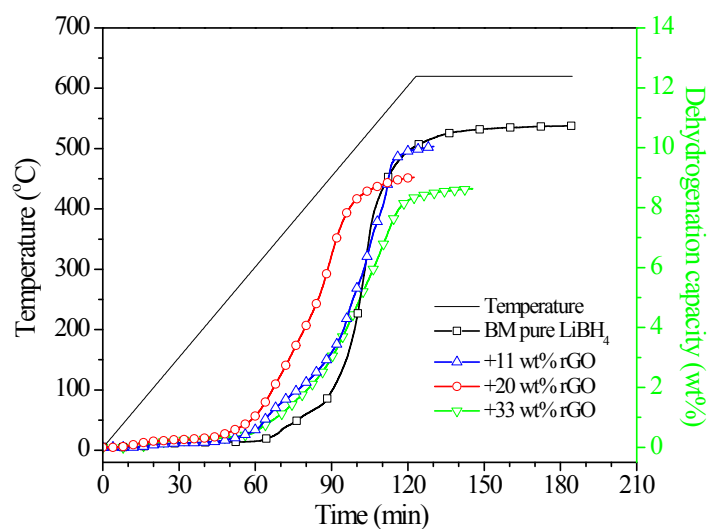

**Figure S4.** TPD dehydrogenation curves of the as-milled  $\text{LiBH}_4$ -x wt% rGO composites (x= 0, 11, 20 and 33).

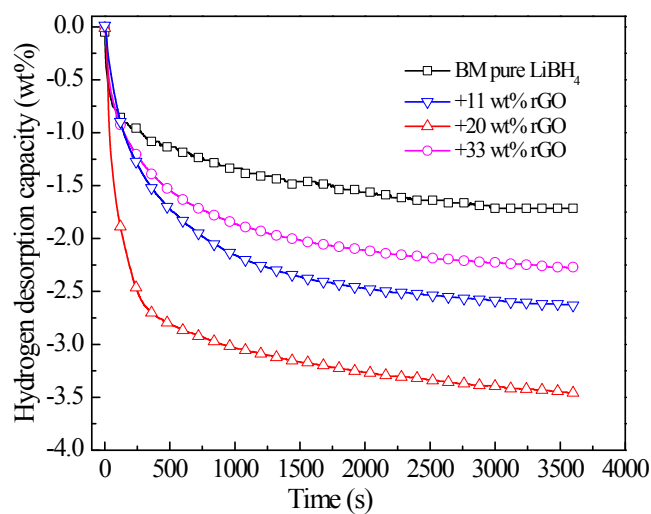

**Figure S5.** Isothermal hydrogen desorption profiles of the as-milled  $\text{LiBH}_4$  with and without rGO composites at 400 °C.

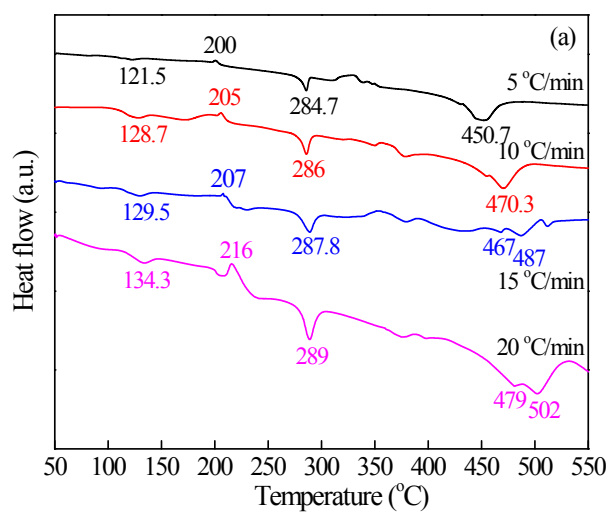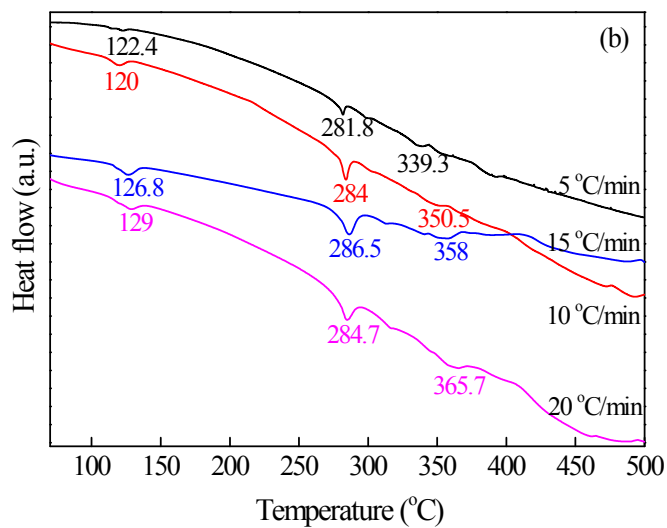

**Figure S6.** DSC profiles of the as-milled (a) LiBH<sub>4</sub>-20 wt% Fe<sub>3</sub>O<sub>4</sub> and (b) LiBH<sub>4</sub>-20 wt% rGO composites at different heating rates.

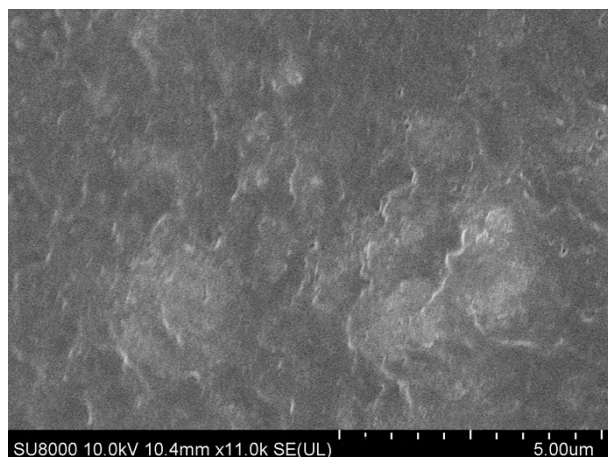

**Figure S7.** SEM image of the LiBH<sub>4</sub>-20 wt% Fe<sub>3</sub>O<sub>4</sub>@rGO composite after first hydrogen desorption at 400 °C.

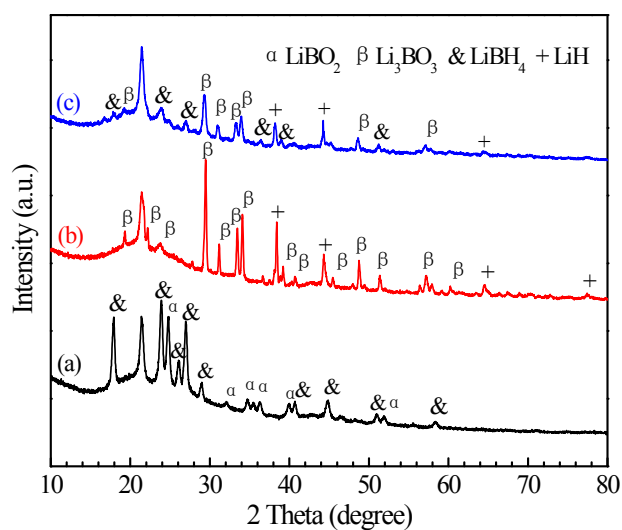

**Figure S8.** XRD patterns of the  $\text{LiBH}_4$ -20 wt% rGO composite at different states: (a) ball-milled; (b) dehydrogenated and (c) rehydrogenated at 400 °C.

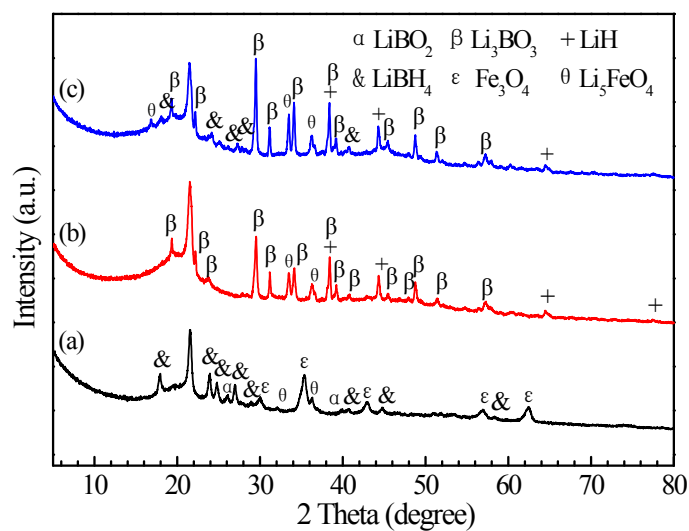

**Figure S9.** XRD patterns of the  $\text{LiBH}_4$ -20 wt%  $\text{Fe}_3\text{O}_4$  composite at different states: (a) ball-milled; (b) dehydrogenated and (c) rehydrogenated at 400 °C.

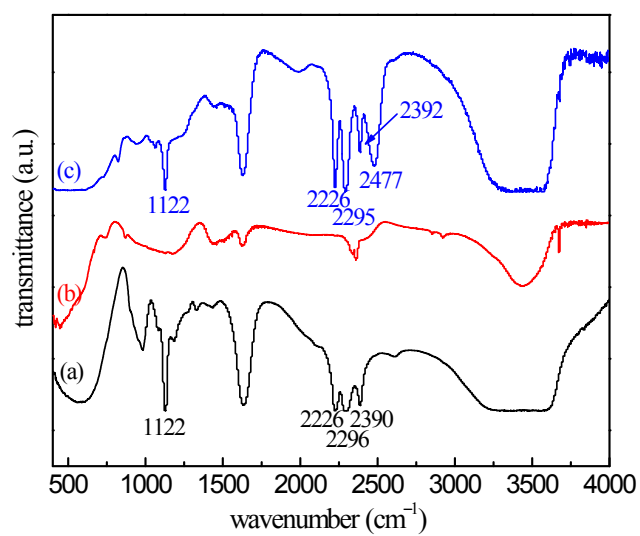

**Figure S10.** FTIR spectra of the  $\text{LiBH}_4$ -20 wt% rGO composite at different states: (a) ball-milled; (b) dehydrogenated and (c) rehydrogenated at 400 °C.

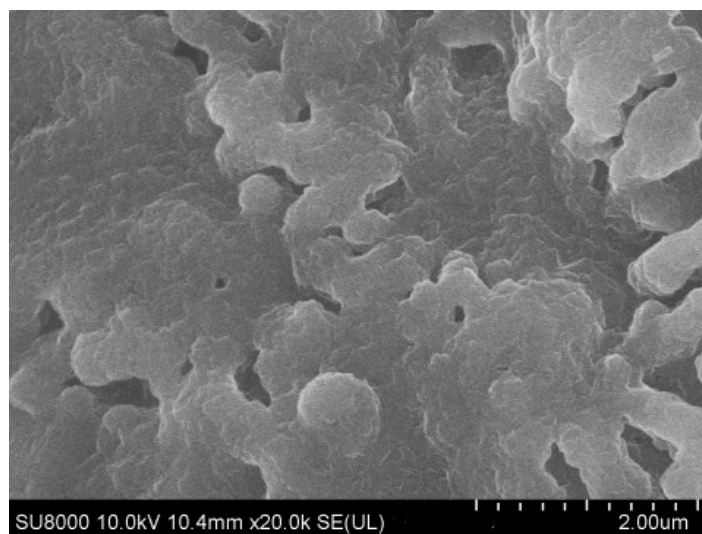

**Figure S11.** SEM image of the  $\text{LiBH}_4$ -20 wt%  $\text{Fe}_3\text{O}_4$ @rGO composite after first hydrogen absorption at 400 °C.
